# Supplementary material for: Direct synthesis of ultrathin FER zeolite nanosheets via a dual-template approach
Source: Royal Society of Chemistry journal article supplement (doi:10.1039/d2ra01334g), 2022-01-01
Supplement: d2ra01334g1.pdf [file d2ra01334g1.pdf]

Electronic Supplementary Information

**Direct synthesis of ultrathin FER zeolite nanosheets via a dual-template approach**

Yuekun Li,<sup>a,b</sup> Duo Zheng Ma,<sup>a,b</sup> Wenhua Fu,<sup>b</sup> Chuang Liu,<sup>b</sup> Yu Wang,<sup>b</sup> Zhendong Wang,<sup>b,\*</sup>  
and Weimin Yang<sup>a,b,\*</sup>

<sup>a</sup> School of Chemical Engineering, East China University of Science and Technology, Shanghai, 200237, PR China, [yangwm.sshy@sinopec.com](mailto:yangwm.sshy@sinopec.com) (W. Yang)

<sup>b</sup> State Key Laboratory of Green Chemical Engineering and Industrial Catalysis, Sinopec Shanghai Research Institute of Petrochemical Technology, Shanghai, 201208, PR China, [wangzd.sshy@sinopec.com](mailto:wangzd.sshy@sinopec.com) (Z. Wang)

## Supplementary Figure Captions

**Fig. S1** XRD patterns of C-FER (a) and SCM-37 with different SAR of 15 (b), 20 (c), 25 (d).

**Fig. S2** XRD patterns of samples crystallized using OTMAC (a), 4-DMAP (b), and both OTMAC and 4-DMAP (c).

**Fig. S3** XRD patterns of samples crystallized at different temperatures.

**Fig. S4** NH<sub>3</sub>-TPD curves of the H-C-FER (a) and H-SCM-37 (b).

**Fig. S5** Py-IR spectra of H-C-FER (A) and H-SCM-37 (B).

**Fig. S6** <sup>27</sup>Al MAS NMR spectra of the as-synthesized (A) and calcined (B) samples: C-FER (a) and SCM-37 (b).

**Table S1** Acid properties of SCM-37 and C-FER determined by NH<sub>3</sub>-TPD and Py-IR.

**Table S2** TiPB conversion and product distributions over C-FER and SCM-37 at different reaction temperatures.

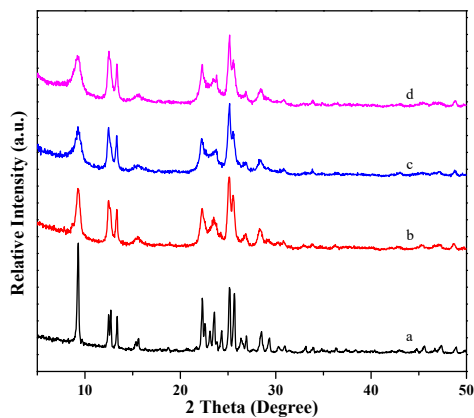

Fig. S1 XRD patterns of C-FER (a) and SCM-37 with different SAR of 15 (b), 20 (c), 25 (d).

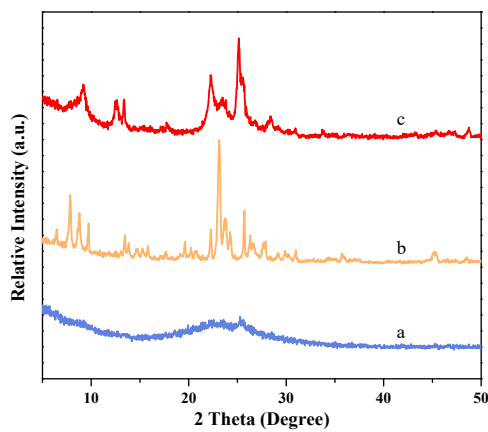

Fig. S2 XRD patterns of samples crystallized using OTMAC (a), 4-DMAP (b) and both OTMAC and 4-DMAP (c).

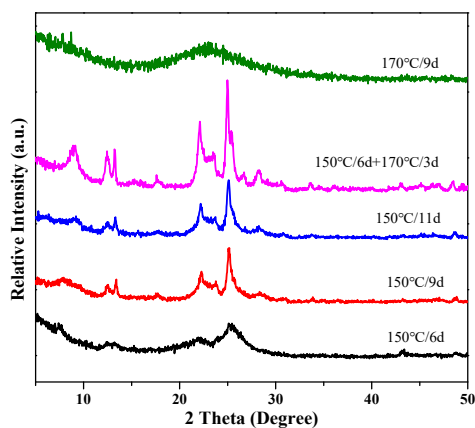

Fig. S3 XRD patterns of samples crystallized at different temperatures.

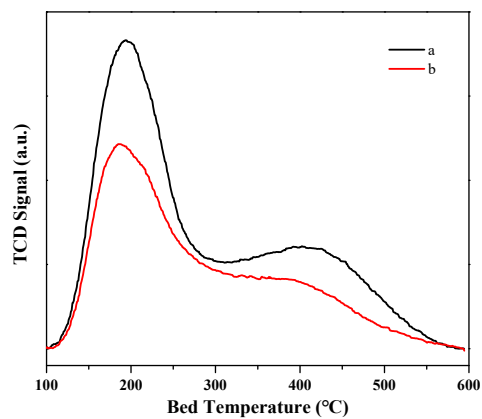

Fig. S4 NH<sub>3</sub>-TPD curves of H-C-FER (a) and H-SCM-37 (b).

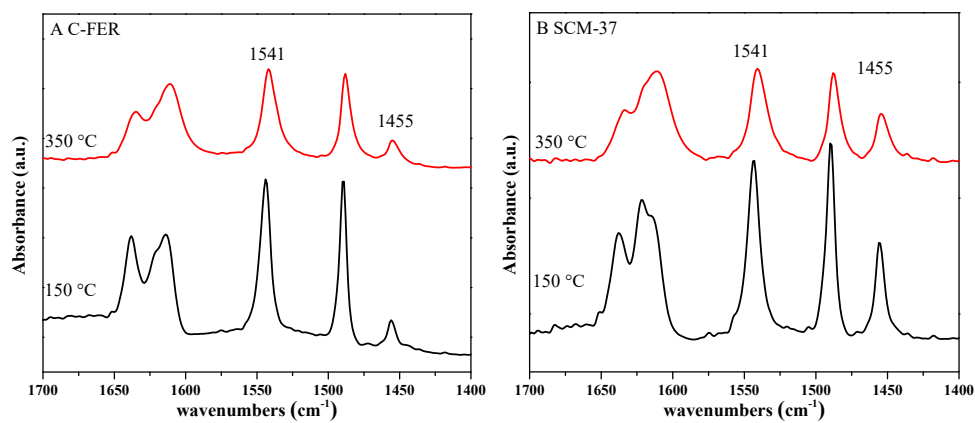

Fig. S5 Py-IR spectra of H-C-FER (A) and H-SCM-37 (B).

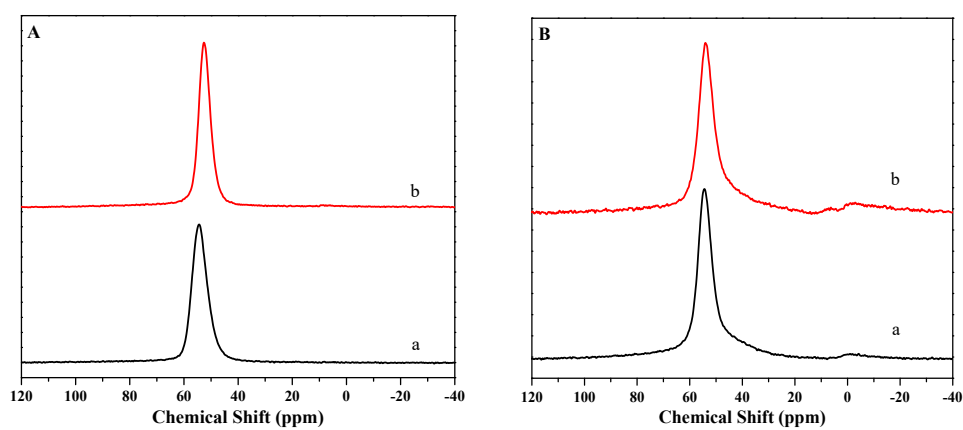

Fig. S6 <sup>27</sup>Al MAS NMR spectra of the as-synthesized (A) and calcined (B) samples: C-FER (a) and SCM-37 (b).

Table S1 Acid properties of SCM-37 and C-FER determined by NH<sub>3</sub>-TPD and Py-IR.

| Sample | Total acid concentration <sup>a</sup><br>( $\mu\text{mol/g}$ ) | B acid sites <sup>b</sup> ( $\mu\text{mol/g}$ ) |        | L acid sites <sup>b</sup> ( $\mu\text{mol/g}$ ) |        |
|--------|----------------------------------------------------------------|-------------------------------------------------|--------|-------------------------------------------------|--------|
|        |                                                                | 150 °C                                          | 350 °C | 150 °C                                          | 350 °C |
| C-FER  | 1349                                                           | 195                                             | 144    | 24                                              | 18     |
| SCM-37 | 955                                                            | 147                                             | 88     | 35                                              | 22     |

<sup>a</sup> Measured by NH<sub>3</sub>-TPD. <sup>b</sup> Measured by Py-IR.

Table S2 TiPB conversion and product distributions over C-FER and SCM-37 at different reaction temperatures.

| Temp. (°C) | TiPB conversion (%) |        | Product selectivity (%) |        |       |        |       |        |
|------------|---------------------|--------|-------------------------|--------|-------|--------|-------|--------|
|            |                     |        | D/PBs                   |        | iPB   |        | Bz    |        |
|            | C-FER               | SCM-37 | C-FER                   | SCM-37 | C-FER | SCM-37 | C-FER | SCM-37 |
| 250        | 27.4                | 74.0   | 84.1                    | 76.1   | 8.6   | 21.2   | 0.2   | 0.4    |
| 275        | 30.5                | 87.3   | 86.1                    | 69.9   | 8.8   | 28.7   | 0.2   | 0.7    |
| 300        | 51.7                | 96.0   | 82.1                    | 48.2   | 14.7  | 47.7   | 0.7   | 3.2    |
| 325        | 71.2                | 99.3   | 75.5                    | 20.5   | 22.5  | 66.0   | 0.8   | 11.9   |
| 350        | 94.6                | 99.9   | 42.4                    | 5.9    | 49.5  | 58.6   | 7.6   | 33.4   |
